# Supplementary material for: Fluorescent nanothermometers based on mixed shell carbon nanodots
Source: Royal Society of Chemistry journal article supplement (doi:10.1039/c5ra12541c), 2015-01-01
Supplement: c5ra12541c1.pdf [file c5ra12541c1.pdf]

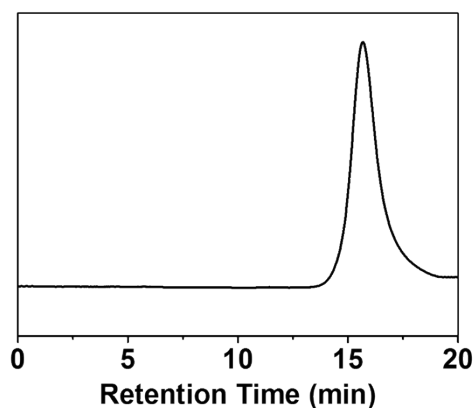

Fig. S1 GPC trace of PNIPAM-NH<sub>2</sub> in THF at room temperature.

Table S1. The number-average molecular weight ( $M_n$ ), weight-average molecular weight ( $M_w$ ) and polydispersity index (PDI) of PNIPAM-NH<sub>2</sub>.

| Sample                 | $M_n$ ( <sup>1</sup> H-NMR) | $M_n$ (GPC) | $M_w$ (GPC) | PDI (GPC) |
|------------------------|-----------------------------|-------------|-------------|-----------|
| PNIPAM-NH <sub>2</sub> | 4520                        | 4659        | 5264        | 1.13      |

Table S2. The calculated fluorescence quantum yields (QY) of the MSCD in various organic solvents.

| Solvent                          | QY   |
|----------------------------------|------|
| CH <sub>2</sub> Cl <sub>2</sub>  | 1.4% |
| C <sub>2</sub> H <sub>5</sub> OH | 0.5% |
| 1,4-dioxane                      | 1.1% |
| DMF                              | 0.2% |
| DMSO                             | 0.8% |
| Quinine sulfate                  | 54%  |

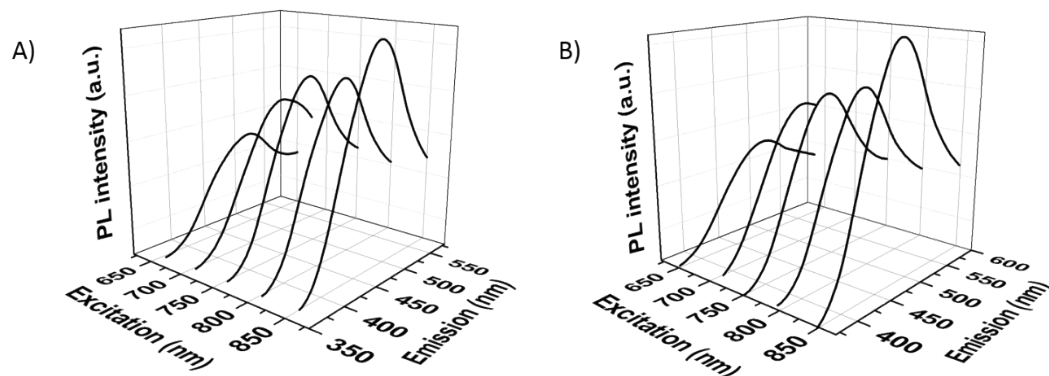

Fig. S2 Upconverted fluorescence properties of the nanothermometer based on the MSCDs at A) 25 °C and B) 50 °C.

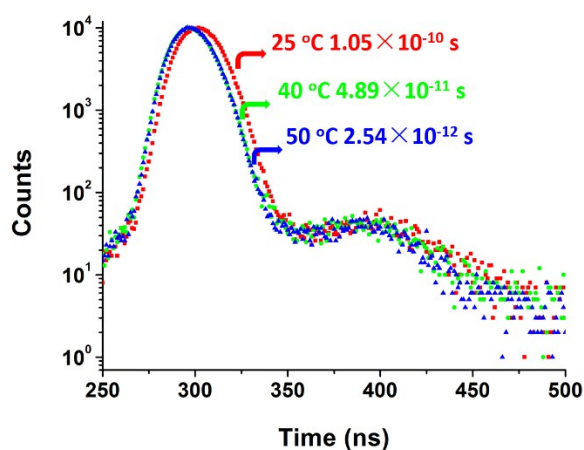

**Fig. S3** Temperature-dependence of the fluorescence decay curves of the MSCD (320 nm excitation).

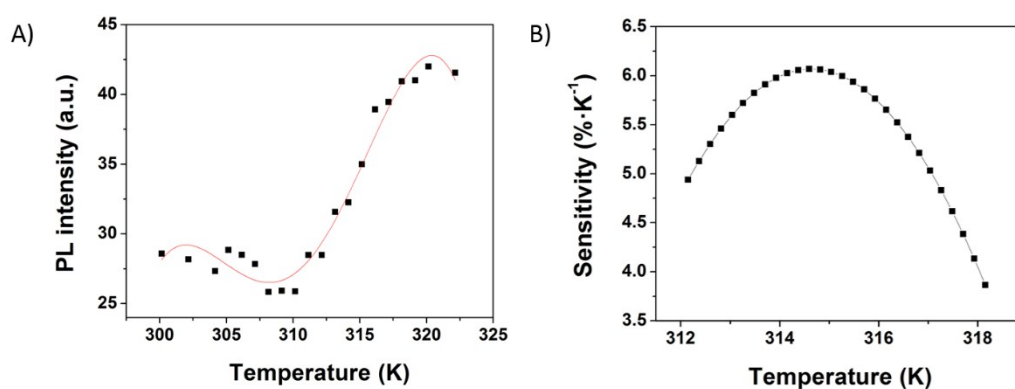

**Fig. S4** A) Temperature-dependence of the emission intensity of the main peaks located at 428 nm in the fluorescence spectrum of the CSCCD fitted through polynomial interpolations implemented with Origin<sup>®</sup>. B) Temperature dependence of the relative sensitivity values for the fluorescence nanothermometer taking emission wavelength located at 428 nm as the observing point.

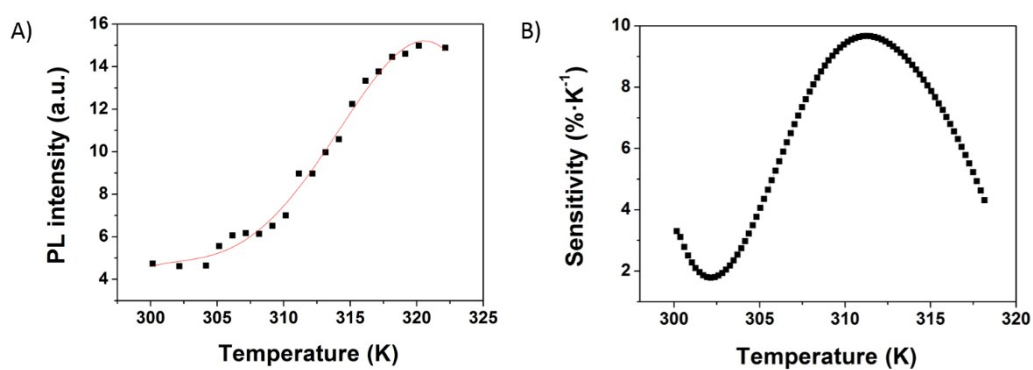

**Fig. S5** A) Temperature-dependence of the emission intensity of the main peaks located at 428 nm in the fluorescence spectrum of the CSCCD fitted through polynomial interpolations implemented with Origin<sup>®</sup>. B) Temperature dependence of the relative sensitivity values for the fluorescence nanothermometer taking emission wavelength located at 527 nm as the observing point.

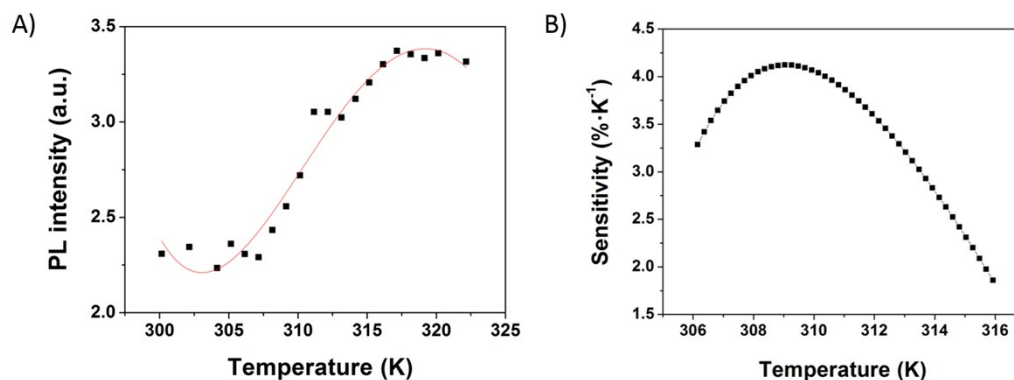

**Fig. S6** A) Temperature-dependence of the fluorescence intensity ratio between the emission wavelength at 428 and 481 nm ( $I_{428}/I_{481}$ ) fitted through polynomial interpolations implemented with Origin<sup>®</sup>. B) Temperature dependence of the relative sensitivity values for the fluorescence nanothermometer taking fluorescent ratiometric method ( $I_{428}/I_{481}$ ).

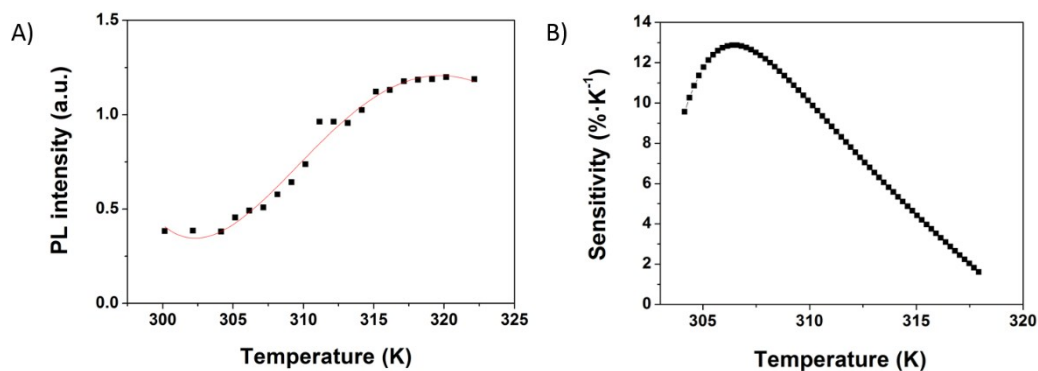

**Fig. S7** A) Temperature-dependence of the fluorescence intensity ratio between the emission wavelength at 527 and 481 nm ( $I_{527}/I_{481}$ ) fitted through polynomial interpolations implemented with Origin<sup>®</sup>. B) Temperature dependence of the relative sensitivity values for the fluorescence nanothermometer taking fluorescent ratiometric method ( $I_{527}/I_{481}$ ).
